# Supplementary material
Source: PubMed Central journal article supplement (PMC395935)

**A**

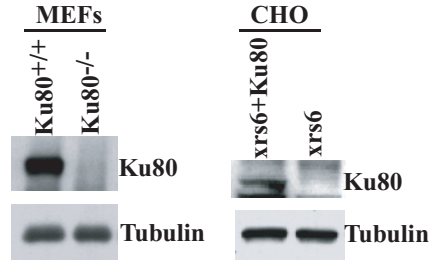

**B**

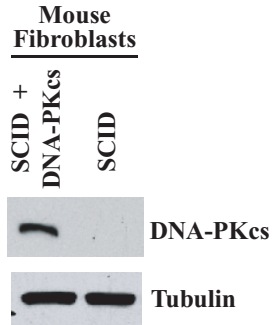

Supplement: pnas_101_16_6134__1.pdf [file pnas_101_16_6134__1.pdf]

**A**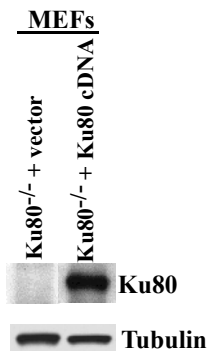**B**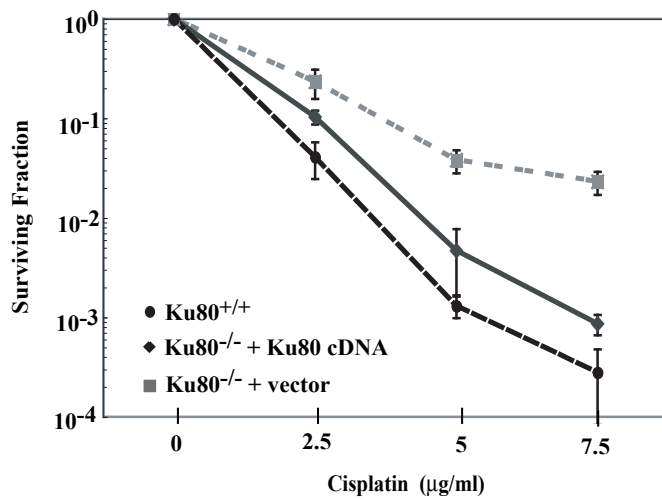

Supplement: pnas_101_16_6134__2.pdf [file pnas_101_16_6134__2.pdf]

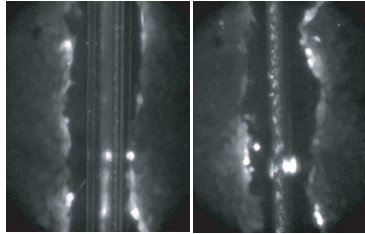

**Wild-type MEFs**  
**Untreated**

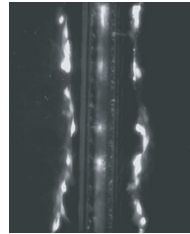

**Wild-type MEFs**  
**+  
50 μM Oleamide**

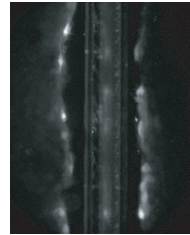

**Wild-type MEFs**  
**+  
50 μM Lindane**

Supplement: pnas_101_16_6134__3.pdf [file pnas_101_16_6134__3.pdf]

## Wild-type MEFs

Untreated + 50 $\mu$ M Lindane

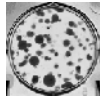

0.22

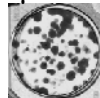

0.25

Cloning efficiency

Supplement: pnas_101_16_6134__4.pdf [file pnas_101_16_6134__4.pdf]

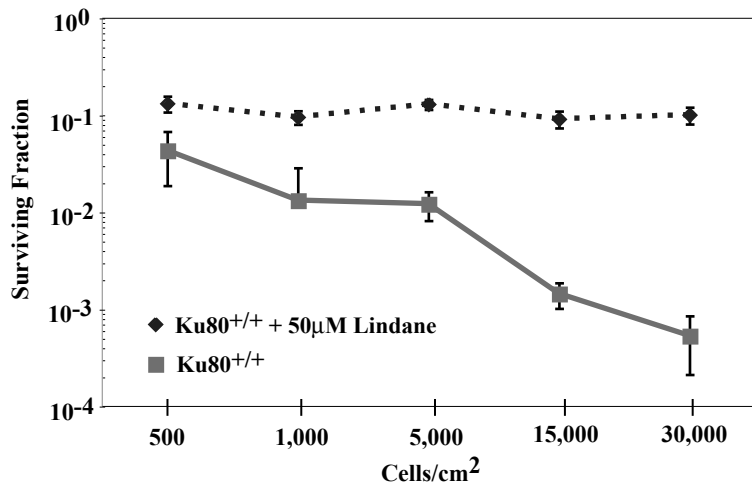

Supplement: pnas_101_16_6134__5.pdf [file pnas_101_16_6134__5.pdf]

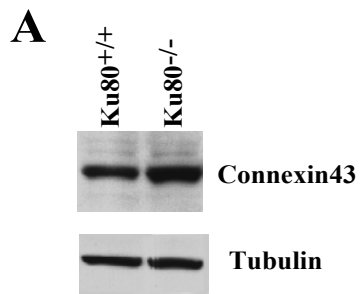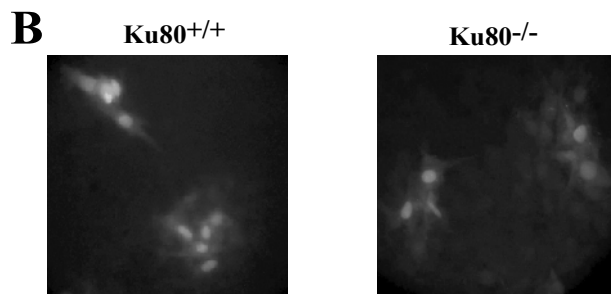

Supplement: pnas_101_16_6134__6.pdf [file pnas_101_16_6134__6.pdf]
